# Supplementary material for: Metal ion-assisted reshaping of Cu2O nanocrystals for catalytic applications
Source: Royal Society of Chemistry journal article supplement (doi:10.1039/c3ta13182c), 2013-01-01
Supplement: c3ta13182c.pdf [file c3ta13182c.pdf]

**Supporting Information**

## **Metal-Ion Assisted Reshaping of Cu<sub>2</sub>O Nanocrystals for Catalytic Applications**

**Jiyeon Kim, Yongwoo Kwon and Hyunjoo Lee\***

Department of Chemical and Biomolecular Engineering, Yonsei University, Seoul 120-749, Republic of Korea.

Fax: 82 2 312 6401; Tel: 82 2 2123 5759; E-mail: [azhyun@yonsei.ac.kr](mailto:azhyun@yonsei.ac.kr)

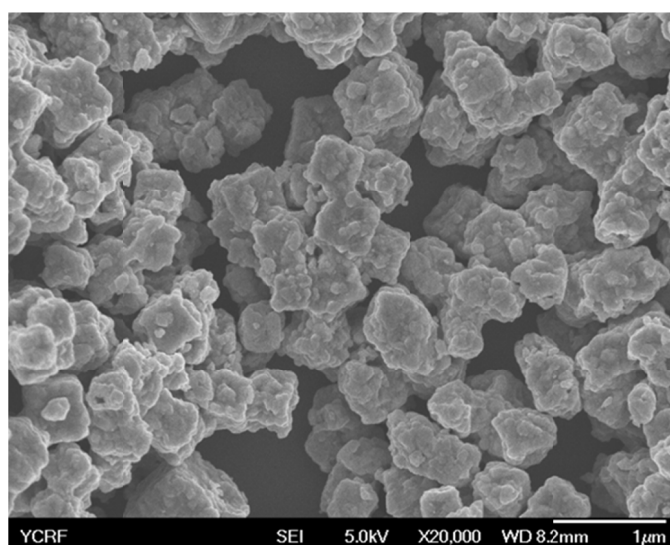

**Figure S1.** SEM image of CuO particles

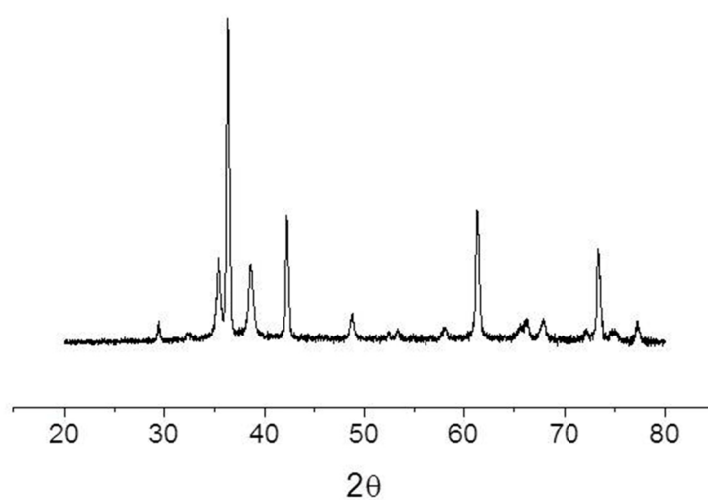

**Figure S2.** XRD result of Pt ion-assisted reshaped cubes after 2 hrs of transformation

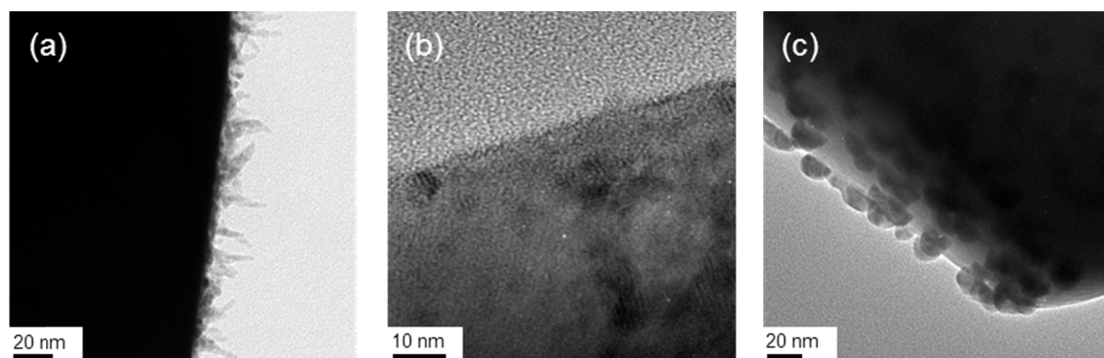

**Figure S3.** TEM images when the reshaping was performed at room temperature instead of 100°C; (a) Pd, (b) Pt, and (c) Au

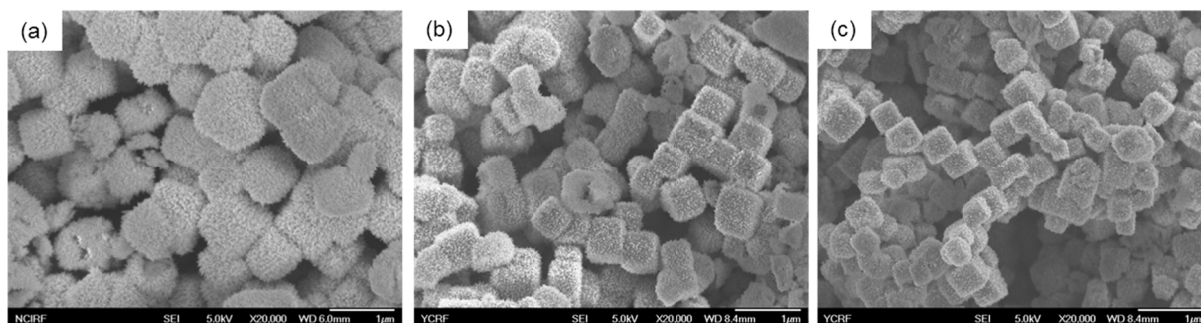

**Figure S4.** SEM images of Pd cubes with different N<sub>2</sub> purging times; (a) 0 min, (b) 30 min, (c) 60 min.

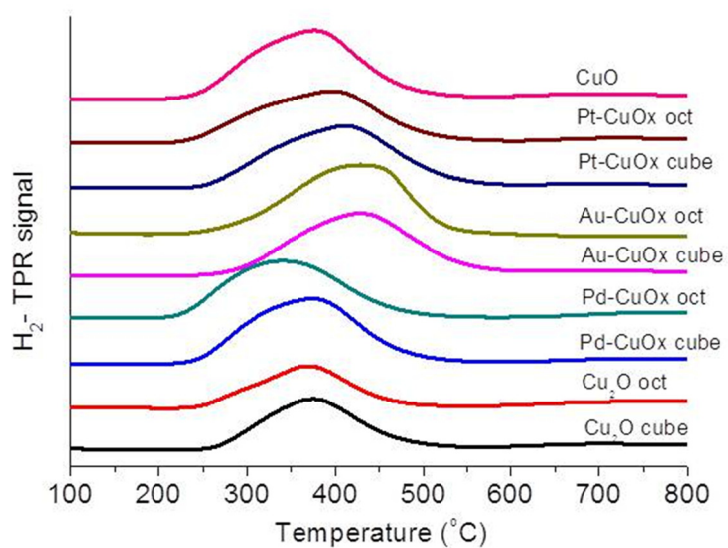

**Figure S5.** Temperature-programmed reduction (TPR) results for various copper oxide catalysts.

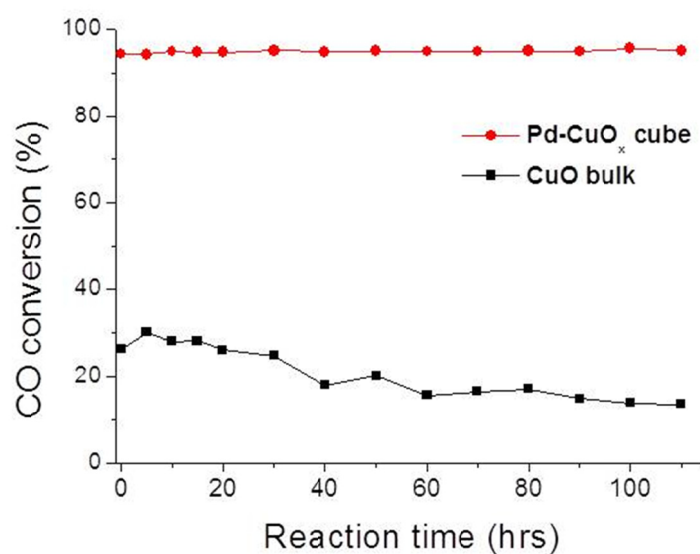

**Figure S6.** Long-term stability test for CO oxidation at 140°C when (a) Pd-CuO<sub>x</sub> cubes and (b) bulk CuO were used as catalysts.

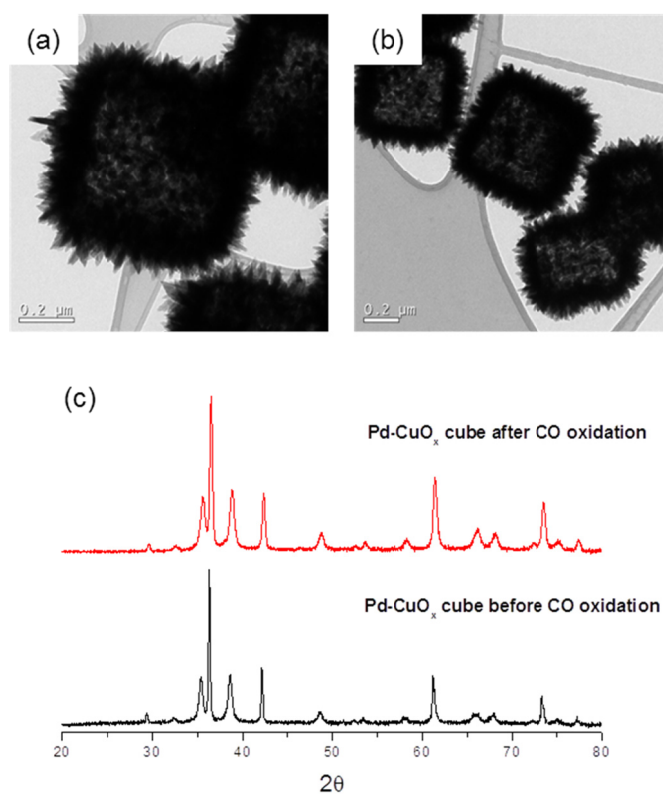

**Figure S7.** SEM images of Pd-CuO<sub>x</sub> cubes (a) before and (b) after CO oxidation, (c) XRD data showing no phase change before and after the reaction.
